# Supplementary material
Source: Springer Nature journal article supplement (https://www.springermedizin.de/resource/supplementary/13256_2011_1793_MOESM4_ESM.pdf/9648504)

Centromere

Xq11.2-Xq12 region

Telomere

*Androgen receptor gene*

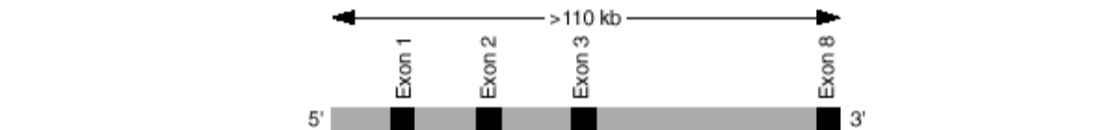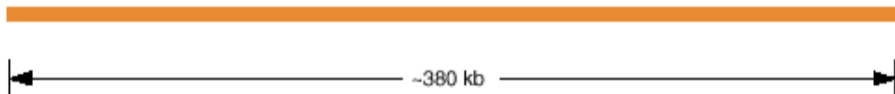

**LSI Androgen Receptor Gene**

Supplement: MOESM4 [file 9648504]
